1 Knowledge of self-care and complications of diabetes mellitus among diabetes  
2 mellitus patients in Addis Ababa, Ethiopia

3  
4 *Roman Getachew<sup>1</sup> and Dagmawit Tewahido<sup>2</sup>*

5 *1Epidemiology and Biostatistics Department, Addis Continental Institute of Public*

6 *Health, Addis Ababa, Ethiopia*

7 *2 Nutrition and Behavioral Sciences Department, Addis Continental Institute of Public Health,*

8 *Addis Ababa, Ethiopia*

9  
10 **CORRESPONDING AUTHOR:**

11 Roman Getachew

12 Email: [getnewroman21@gmail.com](mailto:getnewroman21@gmail.com) (RG)

13 **Abstract**

14 **Background** – Diabetes mellitus is a progressive disease that compromises the quality of life of  
15 the victims. Patients’ knowledge about diabetes mellitus self-care is vital in achieving targeted  
16 glycemic control and minimizing complications of the disease. However, there are limited studies  
17 in Ethiopia on the subject to guide interventions. Hence, this paper aimed to assess knowledge  
18 about diabetic self-care and complications among diabetes mellitus patients in Addis Ababa,  
19 Ethiopia.

20 **Methods** – An institutional-based cross-sectional study design was employed. A structured  
21 questionnaire was used to assess knowledge; participants who responded correctly to at least 6 of  
22 the eight questions were classified as having good knowledge about the complications and those

23 who answered <6 questions correctly were classified as having poor knowledge. Participants who  
24 correctly responded to  $\geq 30$  of the 37 self-care questions were classified as having good knowledge  
25 about diabetes self-care; those who correctly responded to <30 questions were classified as having  
26 poor knowledge. Multivariate logistic regression analyses were used to identify associated factors.  
27 **Result-** Overall, 202 (51.7%) of the study participants had good knowledge about the  
28 complications, and 279 (71.4%) of the participants had a good knowledge of self-care. Receiving  
29 diabetic education was a significant modifiable factor for having poor knowledge about both the  
30 complication (AOR= 3.078(1.323,7.160)) and the self-care (AOR=7.645(3.153,18.538)).  
31 **Conclusion-** About half (51.7%) of the participants had good knowledge about the complications,  
32 and about three in four (71.4%) had good knowledge about self-care. Receiving diabetic education  
33 was significantly associated with both complication and self-care knowledge status. Focusing on  
34 the quality and quantity of the information that is delivered to diabetes mellitus patients can  
35 improve the quality of care and the outcome.

## 36 **Introduction**

37 Diabetes is one of the non-communicable chronic metabolic disorders characterized by  
38 hyperglycemia progressively leading to complications to organ systems (1,2). Such complications  
39 have been becoming more prevalent globally particularly in developing countries (2). From a  
40 study in Ethiopia, the overall prevalence of Diabetes Mellitus (DM) complications is 72.4% in  
41 Type 2 diabetes mellitus patients and 27.6% in Type 1 diabetes mellitus patients (3) Knowledge  
42 about the complications and self-care has significant effect on adequate glycemic control and  
43 treatment success(4–6) and is one of the patient related factors (7).

44 Different studies, however, show that complications of diabetes are not well known by the patients  
45 themselves. In a study from Nepal, good knowledge about the complications was only 24.2% (5).  
46 In China and Saudi Arabia, only 61.8% and 45.5% of participants knew about retinopathy (8,9).  
47 Knowledge about the complications was 65% in Senegal (10), 45.9% in Northern Ghana (11) and  
48 only 13.1% in Sampa, Ghana (12). In studies from North West Ethiopia and Addis Ababa, 48.5%  
49 and 54.9% of good knowledge was recorded respectively (13,14).

50 Similarly limited knowledge about diabetic self-care was recorded to be 58.28% and 76.6% in  
51 Jordan and Saudi Arabia (15,16), 79.5% in Nigeria (17), 67.8%, 61.3%, 70.4% and 63.3% in  
52 studies conducted in North Shewa, Dessie hospital, Ayder hospital and Jimma medical center,  
53 Ethiopia, respectively (18–21).

54 Different factors were observed to positively or negatively affect the knowledge that DM patients  
55 acquire. While good self-care is associated with being employed, urban residency, receiving  
56 information on diabetic self-care, being married, male gender and earning medium income, good  
57 knowledge about the complications of the disease is associated with- with male gender, younger  
58 age, higher financial status, higher literacy level, and longer duration of illness (12,14,22,23).

59 Knowledge that DM patients have about the disease, it's complications and the self-care is vital in  
60 achieving good glycemic control. Patient education and awareness creation programs are core in  
61 equipping DM patients and those who are involved in giving care with the right knowledge. But  
62 there are concerns about the success of these activities as it can be seen through the burden of the  
63 increasing prevalence of the complications and the failure to achieve the goals set by nations and  
64 the world. There are also limited studies on the subject hence this study was conducted with the  
65 aim to assess knowledge about complications and self-care and the associated factors.

## 66 **Methodology**

### 67 **Study design**

68 Institutional based cross-sectional study design was used to assess the knowledge of diabetes  
69 mellitus patients regarding complications and self-care of the disease.

### 70 **Study setting**

71 The study was conducted at Minilik II referral hospital which is among the 7 public hospitals under  
72 Addis Ababa city administration Health Bureau. The hospital gives service for patients with  
73 communicable and non- communicable diseases such as diabetes mellitus.- DM related services  
74 include screening and diagnosis, treatment and health education. The diagnosis and treatment  
75 including admissions are given as per the standard cost of the hospital where as health educations  
76 are given at a mass for free in addition to the individualized health education given at different  
77 points including at inpatient wards. Clients who are embraced under community-based health  
78 insurance also get the service.

### 79 **Study population**

80 All types of adult DM patients who came to medical referral clinic between March 17 and April  
81 20 were potential candidates. Those who were more than 18 years old, those who were on treatment  
82 for at least one year, those who were able to respond verbally and those who were not diagnosed  
83 to have mental illness were included given their willingness and those who were identified to have  
84 critical physical and mental illness during interview and those who were admitted at time of  
85 interview were excluded.

## 86 **Operational definitions**

87 **Diabetic education-** Diabetic education includes provision of information mainly about diet,  
88 exercise, foot care, cessation of smoking, blood glucose monitoring and medication that DM  
89 patients should be aware of (24). This study focuses on the diabetic education given at mass level,  
90 at the outpatient clinics and the individualized education that patients receive from their respective  
91 physician.

## 92 **Sampling and Sample size**

93 Single and double population proportion formulas were used to get a sample size of 420 including  
94 the 10% non- responsive rate. Systematic random sampling was employed to recruit participants.  
95 The first patient was selected by lottery method and every 5<sup>th</sup> of them were interviewed.

## 96 **Data Collection**

97 A structured and pre- tested questionnaire was developed from conducting literature review and  
98 taking other studies experiences (19,21,25) for the self-care related knowledge questions and from  
99 studies in Ghana(12,22) for the complication related knowledge questions with some  
100 modifications (26,27). The questionnaire had four sections. Section one included demographic  
101 related questions; section two clinical condition of patients; section three questions related to  
102 knowledge about the complications; and section four questions on the self-care. Each question had  
103 “yes”, “no” and “I don’t know” answer options. Those with a score of  $>\text{mean}+1 \text{ SD}$  were classified  
104 to have good knowledge whereas those with a score of  $<\text{mean}-1 \text{ SD}$  were classified to have poor  
105 knowledge (22). Interviews were conducted face-to-face in Amharic (the national language) in a  
106 private space, before patients visit their physicians. Pre- test was conducted on 5% of DM patients.  
107 Data collectors were 2 nurses who were recruited from other unit of the hospital to avoid responder

108 bias. Training was given for data collectors for one day prior to start of data collection. Supervision  
109 and monitoring were conducted regularly by the principal investigator.

## 110 **Data analysis**

111 Data were collected and cleaned using Kobo Toolbox and exported to SPSS version 20. Analysis  
112 and conclusion were made for the 391 responses making the response rate of the study to be  
113 93.09%. Binary logistic regression was done and those variables with  $P < 0.02$  were analyzed by  
114 multivariable logistic regression to select significantly associated factors. Hosmer and Lemeshow  
115 goodness-of-fit-test statistics were used to assess the fitness of the model ( $p\text{-value} \geq 0.05$ ).  
116 Multicollinearity was checked by using cut-off point based on variance inflation factor (VIF)  $< 10$   
117 or tolerance test  $> 0.1$ . Then, multivariable logistic regression analysis at  $P$  value  $< 0.05$  and  
118 adjusted Odds Ratio (AOR) with 95% CI was used to measure the degree of association between  
119 independent variables and outcome variable.

## 120 **Ethical approval**

121 Ethical approval was obtained from the review board of Addis Continental Institute of Public  
122 Health (ACIPH-MPH/039/14) and review board of Addis Ababa Health Bureau  
123 (A/A/H/12128/227). A permission letter was sought from the hospital (5503/69/14). Informed oral  
124 consent was obtained from each participant. Oral consent was approved by the ethics committee  
125 considering the study is minimal risk and anticipating lower literacy level in the old age.  
126 Participation in the study was based on free will and not related to any of participants' regular care.

## 127 **Results**

### 128 **Socio- demographic characteristics**

129 Most of the participants- (53.2%) were males. The mean (SD) age was 57 (8.97) years and nearly  
130 2/3 (65.2%) of the participants were over the age of 55years. Majority (43.5%) attended only  
131 primary education. Almost 99% (98.5%) of the participants are urban residents. More than 80%  
132 (83.6%) were married. Nearly 2/3 (62.4%) of the participants were unemployed. Almost 50%  
133 (47.1%) of the participants have known their diabetic status in the past 5 to 10years. Nearly three  
134 fourth (71.4%) had no known family history of DM.

135 *Table 1: Socio-demographic characteristics of participants*

| Variable                    |                          | Frequency (N=391) | Percent (%) |
|-----------------------------|--------------------------|-------------------|-------------|
| Gender                      | Male                     | 208               | 53.2        |
|                             | Female                   | 183               | 46.8        |
| Mean age (SD)               | 57.23 (8.9699)           |                   |             |
| Age                         | 23- 45                   | 38                | 9.7         |
|                             | 46- 55                   | 98                | 25.1        |
|                             | 56- 85                   | 255               | 65.2        |
| Place of residence          | Urban                    | 385               | 98.5        |
|                             | Rural                    | 6                 | 1.5         |
| Educational level           | Unable to read and write | 21                | 5.4         |
|                             | Primary education        | 170               | 43.5        |
|                             | Secondary education      | 106               | 27.1        |
|                             | Tertiary education       | 94                | 24.0        |
| Marital status              | Married                  | 327               | 83.6        |
|                             | Non- married             | 64                | 16.4        |
| Working status              | working                  | 98                | 25.1        |
|                             | Non- working             | 293               | 74.9        |
| Years since diagnosis of DM | < 5 years                | 59                | 15.1        |
|                             | 5 to 10 years            | 184               | 47.1        |



|                      |              |     |      |
|----------------------|--------------|-----|------|
|                      | > 10 years   | 148 | 37.9 |
| Family history of DM | Yes          | 1   | 0.3  |
|                      | No           | 279 | 71.4 |
|                      | I don't know | 111 | 28.4 |

136 **Clinical condition of participants**

137 In this study 230 (58.8%) of the participants had one or more complications of DM and 56  
 138 (14.3%) had other chronic illnesses than DM. About 318 (81.3%) of the participants had  
 139 glucometer at home but only 317 (81%) of them measure their blood sugar level. 353 (90.3 %) of  
 140 participants received diabetic education of which in 94% of the cases, health professionals were  
 141 the source of information. However, the health education was given only “sometimes” in 88% of  
 142 the cases. Majority of the participants (44%) were taking only insulin at the time of this study.

143 Table 2: Characteristics of clinical condition of participants

| Variables          |                  | Frequency | Percentage (%) |
|--------------------|------------------|-----------|----------------|
| Current medication | Insulin          | 172       | 44             |
|                    | Oral medications | 157       | 40.2           |
|                    | both             | 60        | 15.3           |
|                    | Other            | 2         | 0.5            |
| Complication of DM | Yes              | 230       | 58.8           |
|                    | No               | 161       | 41.2           |

|                                                |                     |     |      |
|------------------------------------------------|---------------------|-----|------|
| Any other chronic illness                      | Yes                 | 56  | 14.3 |
|                                                | No                  | 335 | 85.7 |
| Presence of glucometer at home                 | Yes                 | 318 | 81.3 |
|                                                | No                  | 73  | 18.7 |
| Frequency of blood glucose measurement at home | Never               | 74  | 18.9 |
|                                                | Sometimes           | 309 | 79.0 |
|                                                | Often               | 8   | 2.0  |
| Membership of Ethiopian diabetic association   | Yes                 | 7   | 1.8  |
|                                                | No                  | 384 | 98.2 |
| Family support of any kind                     | Yes                 | 353 | 90.3 |
|                                                | No                  | 38  | 9.7  |
| Ever received diabetic education               | Yes                 | 353 | 90.3 |
|                                                | No                  | 38  | 9.7  |
| Source of information(N=353)                   | Health professional | 332 | 94.1 |
|                                                | Media               | 19  | 5.4  |
|                                                | Other               | 2   | 0.5  |

|                                 |           |     |      |
|---------------------------------|-----------|-----|------|
| Frequency of diabetic education | Never     | 38  | 9.7  |
|                                 | Rarely    | 3   | 0.8  |
|                                 | Sometimes | 345 | 88.2 |
|                                 | Often     | 5   | 1.3  |

#### 144 **Knowledge about complications and self- care of DM**

145 An overall good knowledge about complications of DM was recorded among 202 (51.7%)  
146 participants with a mean (SD) knowledge of 6.69 (1.4). Retinopathy, diabetic foot ulcer and  
147 hypertension were the top 3 well known complications (97.4%, 96.9%, and 96.2% respectively).  
148 Over 90% of participants were observed to know nephropathy, neuropathy and heart disease  
149 (94.4%, 91.8% and 94.6% respectively) whereas hypo sexual dysfunction was the least known  
150 complication (46.8%) by the participants.

151 Good self-care knowledge was recorded among 279 (71.4%) of participants in the present study  
152 with a mean (SD) of 5.939 (1.214). About 1/3 (63.9%) of participants had good knowledge about  
153 signs and symptoms of hyperglycemia. Though over 70% (72.9%) of the participants had good  
154 knowledge about signs and symptoms of hypoglycemia, only 1/3 (32.7%) of them knew about its  
155 treatment. Especially participants were seen to lack knowledge about going to health care institute  
156 when hypoglycemia occurred. Over half (57.8%) of the participants had good knowledge  
157 regarding foot care however only 50% (50.4%) of them knew about annual diabetic foot check-up  
158 at clinic level. Nearly 95% (94.6%) of participants knew about eye care and its use. Most of  
159 participants (98.2%) had good knowledge about exercise in DM patients. All participants knew  
160 that DM patients should take their medication properly and stick to the recommended diet.

161 **Factors associated with good knowledge about Complications and**  
 162 **Self-care**

163 Having good knowledge about the complications was seen to be affected by different factors;  
 164 although Bivariate analysis showed that male gender, higher educational status, having job and  
 165 receiving diabetic education are significantly associated with having good knowledge about the  
 166 complications, multivariate logistic regression analysis revealed that only being married  
 167 (AOR=2.671(1.381,5.164)), having a job (AOR=2.435(1.325,4.476)) and receiving diabetic  
 168 education (AOR= 3.078(1.323,7.160)) are statistically associated with having more than 2 times  
 169 better knowledge about the complications of the disease.

170 *Table 3: Factors associated with knowledge about complications of DM*

| Variables          | Category                 | knowledge on complications |      | COR 95%CI       | p-value | AOR 95%CI        |
|--------------------|--------------------------|----------------------------|------|-----------------|---------|------------------|
|                    |                          | Good                       | Poor |                 |         |                  |
| Sex                | Female                   | 76                         | 107  | 1               |         | 1                |
|                    | Male                     | 126                        | 82   | 2.16(1.44,3.24) | 0.000   | 1.38(0.88,2.174) |
| Educational status | Unable to read and write | 3                          | 18   | 1               |         | 1                |
|                    | Primary                  | 80                         | 90   | 0.07(0.02,0.27) | 0.000   | 2.54(0.68,9.47)  |
|                    | Secondary                | 54                         | 52   | 0.39(0.23,0.68) | 0.001   | 2.73(0.71,10.51) |
|                    | Tertiary                 | 65                         | 29   | 0.46(0.26,0.83) | 0.009   | 3.31(0.79,13.87) |
|                    | Non-married              | 17                         | 47   | 1               |         | 1                |

|                      |               |     |     |                  |       |                 |
|----------------------|---------------|-----|-----|------------------|-------|-----------------|
| Marital status       | Married       | 185 | 142 | 3.60(1.98,6.54)  | 0.000 | 2.67(1.38,5.16) |
| Working status       | Non-working   | 132 | 161 | 1                |       | 1               |
|                      | Working       | 70  | 28  | 3.05(1.86,5.002) | 0.000 | 2.44(1.33,4.48) |
| Year since diagnosis | < 5 years     | 25  | 34  | 1                |       |                 |
|                      | 5 to 10 years | 105 | 79  | 1.81(0.99,3.27)  | 0.05  |                 |
|                      | > 10 years    | 72  | 76  | 1.29(0.70,2.37)  | 0.42  |                 |
| Age of patient       | 23- 45        | 17  | 21  | 1                |       |                 |
|                      | 46- 55        | 61  | 37  | 2.04(0.95,4.35)  | 0.07  |                 |
|                      | 56- 85        | 124 | 131 | 1.17(0.59,2.32)  | 0.66  |                 |
| diabetic education   | Not received  | 8   | 30  | 1                |       | 1               |
|                      | Received      | 271 | 82  | 4.58(2.04,10.26) | 0.000 | 3.08(1.32,7.16) |
| Place of residence   | Rural         | 2   | 4   | 1                |       |                 |
|                      | Urban         | 277 | 108 | 5.46(0.63,47.19) | 0.12  |                 |
| Family support       | Yes           | 19  | 19  | 1                |       |                 |
|                      | No            | 183 | 170 | 1.08(0.55,2.10)  | 0.83  |                 |

171 Regarding knowledge about self-care of the disease, Bivariate analysis revealed that older age,  
 172 longer duration of having the disease, receiving diabetic education and receiving family support  
 173 of any kind are significantly associated with having good self-care knowledge. However,

174 multivariable logistics regression showed that those who are 56 years of age and above have 2.76  
 175 times better knowledge than those who are 45 years of age and below (AOR=2.760(1.130,6.744))  
 176 and those who are 46 to 55 years of age have 3 times better knowledge (AOR= 3.007(1.187,7.616))  
 177 than age groups who are and below 45 years of age; those who have been with the disease for more  
 178 than 10years (AOR=3.376(1.502,7.585)) and 5 to 10 years (AOR=3.833(1.776,8.272)) have more  
 179 than 3 times better knowledge than those who have the disease for less than 5 years; those who  
 180 received diabetic education had more than 7 times better knowledge (AOR=7.645(3.153,18.538))  
 181 about the self- care components of the disease than who didn't receive the diabetic education.

182 *Table 4: Factors associated with knowledge about diabetic self-care*

| Variables          | Category                 | Knowledge on self-care |      | COR 95%CI        | p-value | AOR 95%CI |
|--------------------|--------------------------|------------------------|------|------------------|---------|-----------|
|                    |                          | Good                   | Poor |                  |         |           |
| Sex                | Female                   | 125                    | 58   | 1                |         |           |
|                    | Male                     | 154                    | 54   | 1.32(0.85,2.05)  | 0.21    |           |
| Educational status | Unable to read and write | 11                     | 9    | 1                |         |           |
|                    | Primary                  | 130                    | 40   | 2.955(1.17,7.46) | 0.02    |           |
|                    | Secondary                | 72                     | 34   | 1.925(0.75,4.97) | 0.17    |           |
|                    | Tertiary                 | 66                     | 28   | 2.143(0.82,5.62) | 0.12    |           |

|                      |              |     |     |                   |       |                  |
|----------------------|--------------|-----|-----|-------------------|-------|------------------|
| Marital status       | Non-married  | 40  | 24  | 1                 |       |                  |
|                      | Married      | 239 | 88  | 1.63(0.93,2.86)   | 0.09  |                  |
| Occupation           | Non-working  | 206 | 87  | 1                 |       |                  |
|                      | Working      | 73  | 25  | 1.23(0.73,2.07)   | 0.43  |                  |
| Year since diagnosis | < 5          | 19  | 40  | 1                 |       | 1                |
|                      | 5 to 10      | 146 | 38  | 8.09(4.21,15.53)  | 0.000 | 3.83(1.78,8.27)  |
|                      | >10 years    | 114 | 34  | 7.06(3.62,13.75)  | 0.000 | 3.38(1.50,7.59)  |
| Age in years         | 23- 45       | 13  | 25  | 1                 |       | 1                |
|                      | 46- 55       | 73  | 25  | 5.62(2.49,12.62)  | 0.000 | 3.01(1.19,7.62)  |
|                      | 56- 85       | 193 | 62  | 5.99(2.89,12.41)  | 0.000 | 2.76(1.13,6.74)  |
| Diabetic education   | Not received | 8   | 30  | 1                 |       | 1                |
|                      | Received     | 271 | 82  | 12.39(5.47,28.09) | 0.000 | 7.65(3.15,18.54) |
| Place of residence   | Rural        | 2   | 4   | 1                 |       |                  |
|                      | Urban        | 277 | 108 | 5.13.(0.93,28.42) | 0.06  |                  |
| Family support       | No           | 16  | 22  | 1                 |       | 1                |
|                      | Yes          | 263 | 90  | 4.02(2.02,7.99)   | 0.000 | 1.34(0.55,3.26)  |

## 183 Discussion

184 In this study 51.4% of the participants had good knowledge about complications of DM and 73.1%  
185 about self-care. Diabetic education has been a significant factor that influenced the knowledge  
186 about both diabetic complications and the self-care. Whereas having job and being married  
187 predicted the knowledge about complications of diabetes mellitus, older age and longer duration  
188 of diagnoses were identified to positively affect knowledge about the self- care.

189 The overall good knowledge about the complications is higher in the present study than studies in  
190 Sampa hospital, Ghana (12), Northern Ghana (22) and Northwest Ethiopia (28) where the overall  
191 knowledge level was good among 13.1%, 45.9% and 48.5% of the participants respectively. This  
192 result can be attributed to the higher number of participants with better educational status and  
193 higher urban residential status noticed in the present study. Similar knowledge level of participants  
194 was recorded in studies conducted in Nepal (51%) (29). But the present study has revealed a lower  
195 overall good knowledge level than conducted in Addis Ababa (54.9%) which can be due to the  
196 presence of lower number of participants who attended primary and secondary school when  
197 compared to those who didn't attend at all in the present study (14).

198 Having job, being married and receiving diabetic education are related with good self- care  
199 knowledge. Despite the type, participants who have a job are found to acquire 2 times better  
200 knowledge than those who are not working (AOR=2.44(1.33,4.48)) and those who are married  
201 have nearly 3 times better knowledge than those who are not married (AOR=2.67(1.38,5.16)).  
202 Those patients who received diabetic education or participated in diabetic counseling sessions had  
203 3 times more knowledge (AOR=3.08(1.32,7.16)) than those who didn't receive diabetic education  
204 which is supported by the studies from Nepal (29) and Addis Ababa (14). Age, educational level,



205 duration of DM, and family history of DM are found to be predictors of knowledge level about the  
206 complications of DM in other studies unlike the present study.

207 Regarding knowledge of participants about self-care, the overall good knowledge recorded in this  
208 study was higher than those conducted at Jimma medical center, Ethiopia (63.3%) (21), North  
209 Shewa Ethiopia (67.8%) (18) and South-west Ethiopia (64.8%) (30). These results could be due to  
210 the lower number of participants who are unable to read and write and higher urban living status  
211 in the current study. However, a similar knowledge level was recorded in a study at Ayder hospital  
212 Ethiopia (70.4%) (25).

213 In this study older age, longer duration of diagnosis and receiving diabetic education has been  
214 found to be protective for having good knowledge about the self- care of the disease. Thos who  
215 are in the age group of 46 to 55 years of age showed a 3 times better knowledge  
216 (AOR=3.007(1.19,7.62)) and those who are 56 to 85 years of age recorded a 2.8 times better  
217 knowledge (AOR=2.760(1.13,6.74)) than those who are in the age group 23 to 45 years of age.  
218 Participants who have been diagnosed in the last 5 to 10 years were found to acquire 3.8 times  
219 better knowledge (AOR=3.833(1.78,8.27))and those who had the disease for over 10years had 3.4  
220 times better knowledge (AOR=3.376(1.50,7.59)) than those who have the disease for less than 5  
221 years. Diabetic education also resulted in 7.6 times better knowledge in those who received the  
222 education or awareness (AOR=7.645(3.15,18.54)) than those who didn't. Unlike the present study,  
223 in a study from Jimma medical center (21) age group of 40 to 60 years was associated to poor  
224 knowledge and duration of diagnosis less than 5 years was associated with good knowledge about  
225 the self- care. Receiving diabetic education has also been a significantly associated factor for  
226 having good self-care knowledge in a study from North Shewa Ethiopia (18)which is in line with  
227 this study. A higher knowledge about the self-care was recorded in Nigeria (79.5%) with a possible

228 explanation to be higher number of participants who attended tertiary education (17)

229 Knowledge which diabetes mellitus patients have about the complications, the self- care and the

230 disease in general has been mentioned as an important factor from different perspectives in the

231 progress of the disease (7). It is evidenced that attending diabetic education affects knowledge

232 positively modifying quality of life and the success in achieving good glycemic control (2,7,31–

233 35). The present study as well as studies conducted in Ethiopia, Ghana, Brazil, Bangladesh and

234 Nepal revealed the same effect (2,10,12,14,22,29).

235 Non communicable diseases are commonly considered as the problem of the developed world and

236 the rich by the community. Intense health education and promotion as well as diabetic education

237 are required for those who are suffering from the disease and the people who are involved in giving

238 care. Improving the knowledge status not only of the diabetes mellitus patients and care givers but

239 also the community at large, can create a holistic and supportive environment. It can also be the

240 starting point in improving the burden on the health system and achieving the sustainable

241 development goal- 3 (1).

## 242 **Limitations of the study**

243 Our study was conducted in the capital city of Ethiopia where access to education is better. Thus,

244 the knowledge level in less urban and less educated communities in Ethiopia can be poorer than

245 what is reported in this study therefor conducting similar studies at different settings especially at

246 rural areas, where access to media and good health care is low, might reveal different knowledge

247 level of diabetes mellitus patients and related affecting factors at the respective context which

248 will contribute to act accordingly.

## 249 **Conclusion and recommendation**

250 About half (51.7%) of the participants had good knowledge about the complications, and about  
251 three in four (71.4%) had good knowledge about self-care. Receiving diabetic education was  
252 significantly associated with both complication and self-care knowledge status. Focusing on the  
253 quality and quantity of the information that is delivered to diabetes mellitus patients can improve  
254 the quality of care and the outcome.

## 255 **Declaration**

### 256 **Consent for publication:**

257 **Availability of data and material:** The datasets generated/or analyzed during the  
258 current study are available from the corresponding author on reasonable request.

259 **Competing interests:** The authors declare that they have no conflict of interest.

260 **Funding:** This research has not received any funding.

261 **Authors' contributions:** Dr Roman: initiated the research, conducted the research, data  
262 entry and analysis, and wrote the first draft of the manuscript. Dr Dagmawit: contributed to the  
263 supervision and advise of the research activity and write-up of the manuscript.

## 264 **Acknowledgements**

265 We thank the patients and the hospital team for their heartily cooperation.

## 266 **References**

- 267 1. Roglic. WHO Global report on diabetes: A summary [Internet]. [cited 2021 Oct 15].  
268 Available from: [https://www.ijncd.org/article.asp?issn=2468-](https://www.ijncd.org/article.asp?issn=2468-8827;year=2016;volume=1;issue=1;spage=3;epage=8;aulast=Roglic)  
269 [8827;year=2016;volume=1;issue=1;spage=3;epage=8;aulast=Roglic](https://www.ijncd.org/article.asp?issn=2468-8827;year=2016;volume=1;issue=1;spage=3;epage=8;aulast=Roglic)
- 270 2. Dizdar OS, Gul OO, Baspınar O, Cander S, Sisman P, Eker B, et al. Assessment of  
271 Factors Related to the Understanding of Education and Knowledge of Self-Care among Patients  
272 with Diabetes Mellitus: A Cross-Sectional Prospective Study. *Adv Ther.* 2016 Sep;33(9):1565–  
273 78.
- 274 3. Sheleme T, Mamo G, Melaku T, Sahilu T. Glycemic Control and its Predictors among  
275 Adult Diabetic Patients attending Mettu Karl Referral Hospital, Southwest Ethiopia: A  
276 Prospective Observational Study. *Diabetes Ther.* 2020 Aug;11(8):1775–94.
- 277 4. Ahmed KR, Jebunessa F, Hossain S, Chowdhury HA. Ocular knowledge and practice  
278 among type 2 diabetic patients in a tertiary care hospital in Bangladesh. *BMC Ophthalmol.* 2017  
279 Sep 19;17:171.
- 280 5. Acharya OK, Kc T, Shrestha KD. Knowledge and Practice on Prevention of  
281 Complications of Diabetes Mellitus among Patients with Diabetes in a Tertiary Hospital. *J Inst*  
282 *Med Nepal.* 2019 Dec 4;41(2):50–5.
- 283 6. Bukhsh A, Khan TM, Sarfraz Nawaz M, Sajjad Ahmed H, Chan KG, Goh BH.  
284 Association of diabetes knowledge with glycemic control and self-care practices among  
285 Pakistani people with type 2 diabetes mellitus. *Diabetes Metab Syndr Obes Targets Ther.*  
286 2019;12:1409–17.
- 287 7. Jaam M, Awaisu A, Mohamed Ibrahim MI, Kheir N. A holistic conceptual framework  
288 model to describe medication adherence in and guide interventions in diabetes mellitus. *Res Soc*  
289 *Adm Pharm.* 2018 Apr;14(4):391–7.
- 290 8. Duan F, Zheng Y, Zhao Q, Huang Z, Wu Y, Zhou G, et al. Knowledge and practices  
291 regarding diabetic retinopathy among diabetic patients registered in a chronic disease  
292 management system in eastern China. *PLoS ONE.* 2020 Aug 21;15(8):e0234733.
- 293 9. Al-Asbali T, Aldawari SA, Alzahim IA, Alalawi H, Khandekar R, Lotfy NM.  
294 Knowledge, attitude and practice regarding diabetic retinopathy screening and its management  
295 among diabetic patients at a private hospital of Riyadh, Saudi Arabia. *Saudi J Ophthalmol.* 2020  
296 Dec 28;34(2):85–93.

- 297 10. Rahaman KhS, Majdzadeh R, Holakouie Naieni K, Raza O. Knowledge, Attitude and  
298 Practices (KAP) Regarding Chronic Complications of Diabetes among Patients with Type 2  
299 Diabetes in Dhaka. *Int J Endocrinol Metab*. 2017 Jul 30;15(3):e12555.
- 300 11. Afaya RA, Bam V, Azongo TB, Afaya A. Knowledge of chronic complications of  
301 diabetes among persons living with type 2 diabetes mellitus in northern Ghana. *PLoS ONE*. 2020  
302 Oct 28;15(10):e0241424.
- 303 12. Obirikorang Y, Obirikorang C, Anto EO, Acheampong E, Batu EN, Stella AD, et al.  
304 Knowledge of complications of diabetes mellitus among patients visiting the diabetes clinic at  
305 Sampa Government Hospital, Ghana: a descriptive study. *BMC Public Health*. 2016 Jul  
306 26;16:637.
- 307 13. Aschalew AY, Yitayal M, Minyihun A, Bisetegn TA. Self-care practice and associated  
308 factors among patients with diabetes mellitus on follow up at University of Gondar Referral  
309 Hospital, Gondar, Northwest Ethiopia. *BMC Res Notes*. 2019 Sep 18;12:591.
- 310 14. Chekol GZ, Mengistu D, Tadesse AW. Is the Duration of Diabetes Diseases Positively  
311 Associated With Knowledge About Diabetic Complications? Knowledge of Diabetes Mellitus  
312 Complications and Associated Factors Among Type-2 Diabetic Patients in Public Hospitals of  
313 Addis Ababa, 2020. *Front Public Health*. 2021;9:812586.
- 314 15. Alhaik S, Anshasi HA, Alkhalwaldeh J, Soh KL, Naji AM. An assessment of self-care  
315 knowledge among patients with diabetes mellitus. *Diabetes Metab Syndr*. 2019 Feb;13(1):390–4.
- 316 16. Alshammari ZJ, Alsaid LA, Parameaswari P, Alzahrani AA. Attitude and knowledge  
317 about foot care among diabetic patients in Riyadh, Saudi Arabia. *J Fam Med Prim Care*. 2019  
318 Jun;8(6):2089–94.
- 319 17. Jackson IL, Adibe MO, Okonta MJ, Ukwe CV. Knowledge of self-care among type 2  
320 diabetes patients in two states of Nigeria. *Pharm Pract*. 2014;12(3):404.
- 321 18. Zerihun Sahile L, Benayew Shifraew M, Zerihun Sahile M. Diabetic Self-Care  
322 Knowledge and Associated Factors Among Adult Diabetes Mellitus Patients on Follow-Up Care  
323 at North Shewa Zone Government Hospitals, Oromia Region, Ethiopia, 2020. *Diabetes Metab  
324 Syndr Obes Targets Ther*. 2021;14:2111–9.
- 325 19. Tuha A, Getie Faris A, Andualem A, Ahmed Mohammed S. Knowledge and Practice on  
326 Diabetic Foot Self-Care and Associated Factors Among Diabetic Patients at Dessie Referral  
327 Hospital, Northeast Ethiopia: Mixed Method. *Diabetes Metab Syndr Obes Targets Ther*. 2021  
328 Mar 17;14:1203–14.

- 329 20. Niguse H, Belay G, Fisseha G, Desale T, Gebremedhn G. Self-care related knowledge,  
330 attitude, practice and associated factors among patients with diabetes in Ayder Comprehensive  
331 Specialized Hospital, North Ethiopia. *BMC Res Notes*. 2019 Jan 18;12:34.
- 332 21. Mekonnen Y, Hussien N. Self-care Related Knowledge, Attitude, and Practice and  
333 Associated Factors Among Patients with Type 2 Diabetes in JMC, Ethiopia. *Diabetes Metab  
334 Syndr Obes Targets Ther*. 2021 Feb 5;14:535–46.
- 335 22. Afaya RA, Bam V, Azongo TB, Afaya A. Knowledge of chronic complications of  
336 diabetes among persons living with type 2 diabetes mellitus in northern Ghana. *Thet Wai K,  
337 editor. PLOS ONE*. 2020 Oct 28;15(10):e0241424.
- 338 23. Belsti Y, Akalu Y, Animut Y. Attitude, practice and its associated factors towards  
339 Diabetes complications among type 2 diabetic patients at Addis Zemen District hospital,  
340 Northwest Ethiopia. *BMC Public Health*. 2020 May 26;20:785.
- 341 24. Toobert DJ, Hampson SE, Glasgow RE. The summary of diabetes self-care activities  
342 measure: results from 7 studies and a revised scale. *Diabetes Care*. 2000 Jul 1;23(7):943–50.
- 343 25. Niguse H, Belay G, Fisseha G, Desale T, Gebremedhn G. Self-care related knowledge,  
344 attitude, practice and associated factors among patients with diabetes in Ayder Comprehensive  
345 Specialized Hospital, North Ethiopia. *BMC Res Notes*. 2019 Jan 18;12(1):34.
- 346 26. Association AD. Preventive Foot Care in Diabetes. *Diabetes Care*. 2004 Jan 1;27(suppl  
347 1):s63–4.
- 348 27. Colberg SR, Sigal RJ, Yardley JE, Riddell MC, Dunstan DW, Dempsey PC, et al.  
349 Physical Activity/Exercise and Diabetes: A Position Statement of the American Diabetes  
350 Association. *Diabetes Care*. 2016 Nov;39(11):2065–79.
- 351 28. Belsti Y, Akalu Y, Fekadu H, Animut Y. Awareness of complications of diabetes  
352 mellitus and its associated factors among type 2 diabetic patients at Addis Zemen District  
353 Hospital, northwest Ethiopia. *BMC Res Notes*. 2019 Sep 18;12(1):602.
- 354 29. Nabina P, Raj DA. Knowledge regarding diabetic complications among diabetic clients  
355 attending outpatient department in a tertiary hospital, Kathmandu. *J Diabetes Endocrinol*. 2019  
356 Jan 31;10(1):1–7.
- 357 30. Kassa RN, Ibrahim IY, Hailemariam HA, Habte MH. Self-care practice and its predictors  
358 among adults with diabetes mellitus on follow up at public hospitals of Arsi zone, southeast  
359 Ethiopia. *BMC Res Notes*. 2021 Mar 19;14:102.
- 360 31. Shiferaw WS, Akalu TY, Desta M, Kassie AM, Petrucka PM, Aynalem YA. Effect of  
361 educational interventions on knowledge of the disease and glycaemic control in patients with

- 362 type 2 diabetes mellitus: a systematic review and meta-analysis of randomised controlled trials.  
363 BMJ Open. 2021 Dec 9;11(12):e049806.
- 364 32. Bahru Y, Abdulkadir J. Assessment of diabetes education in the teaching hospital, Addis  
365 Ababa, Ethiopia. Diabet Med J Br Diabet Assoc. 1993 Nov;10(9):870–3.
- 366 33. Anderson G, Casasanta D, Motta PC, Sacco E, Cocchieri A, Damiani G, et al. Diabetic  
367 education in nursing: A Rodgers’ evolutionary concept analysis. Nurs Forum (Auckl). 2021  
368 Oct;56(4):986–92.
- 369 34. Abd-El mohsen SA, Mohamed Shehata AA. Evaluating the effect of health education  
370 program on outcomes of type I diabetic patients: A randomized controlled study. Saudi J Biol  
371 Sci. 2020 Nov;27(11):2869–75.
- 372 35. Nassar M, Ahmed TM, AbdAllah NH, El Sayed El Hadidy K, Sheir RES. The impact of  
373 structured diabetes education on glycemic control during Ramadan fasting in diabetic patients in  
374 Beni Suef, Egypt. Diabetes Metab Syndr. 2021 Oct;15(5):102249.
- 375
